# Supplementary material
Source: Springer Nature journal article supplement (https://www.springermedizin.de/resource/supplementary/13601_2013_646_MOESM2_ESM.pdf/9677908)

95% CI baseline adherence to ICS therapy

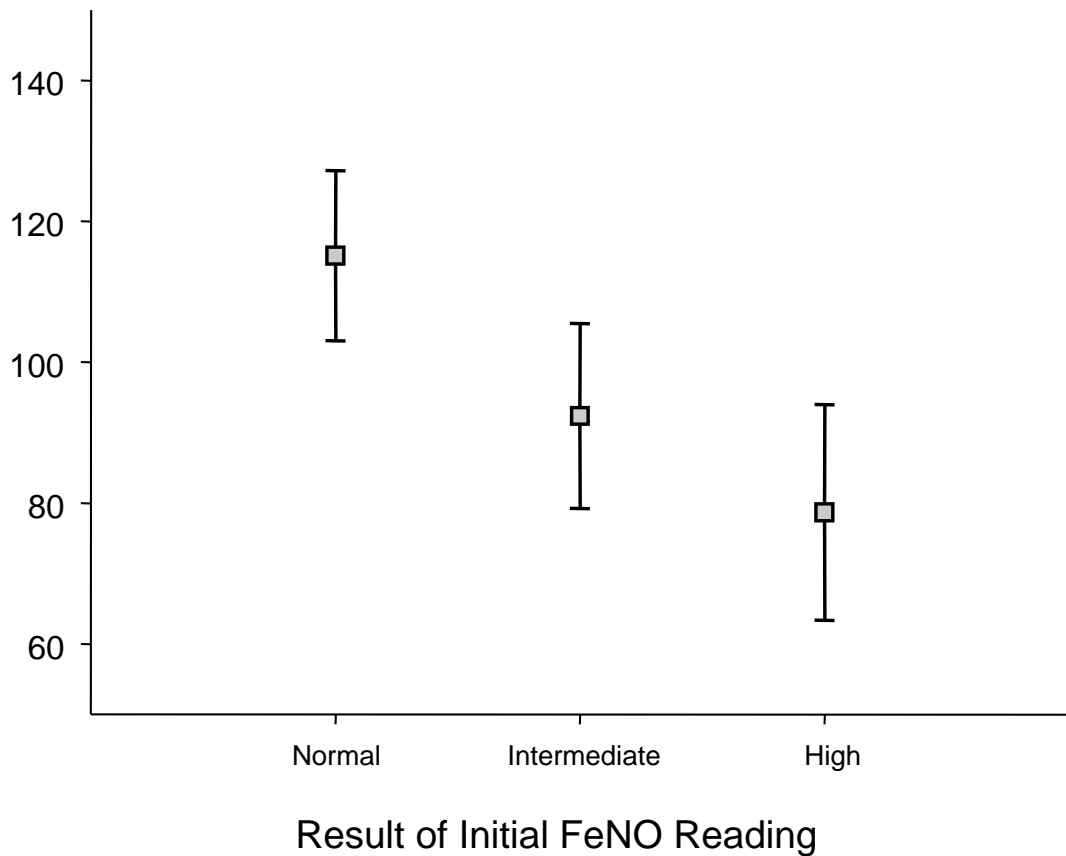

Supplement: MOESM2 [file 9677908]
